# Supplementary material
Source: publisher site journal article supplement (https://www.dovepress.com/article/404247)
Supplement: Supplementary file 1 [file get_supplementary_file.php]

**Supplementary Materials:** Code GI Bleed Protocol


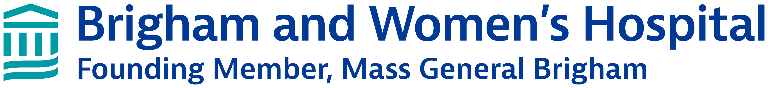


# Code GI Bleed Process

**Overview:**

Patients with life-threatening gastrointestinal (GI) bleeding require prompt unified activation of multiple services. The Code GI Bleed process was designed to 1) enhance communication between services, 2) mobilize accelerated access to diagnostic and therapeutic resources, and 3) clarify a disposition path to the ICU, endoscopy suite, IR suite, or operating room for patients who will imminently arrive or have recently arrived at the Brigham ED with life-threatening GI bleeding.

Life-threatening GI bleeding is defined as a primary diagnosis of upper or lower GI bleeding with evidence of active GI bleeding and **at least one** of the following:

- Hemodynamic instability despite ongoing fluid or blood product administration
- Current or anticipated use of the massive transfusion protocol
- Vasopressor use
- Blakemore or Minnesota tube use
- PEA arrest due to hemorrhagic shock at any time in the presentation

Notes:

- If blood products are needed, please follow our usual ordering/requisition process
- Determine use of anticoagulants and timing of the last dose; refer to hospital reversal policy [hyperlinked] for agent-specific recommendations
- If the need for surgical intervention is anticipated, please consult the ED surgical senior
- CTA of the abdomen and pelvis with our dedicated GI bleeding protocol should be performed unless the patient is too unstable to travel to the scanner. Please write “Active GI bleed” in the free-text section called “Please provide any additional clinical context…” of the CTA order

**Duties and Responsibilities:**

1. **Expected Patients**

The Access Nurse will inform the ED Exeter Attending and contact the page operator to activate (or will themselves directly page) the Code GI Bleed Team Pager (Group 294) and provide the details indicated below. If activation criteria are unclear, the Access Nurse should ask the ED Exeter attending for guidance.

The page itself will state: “Patient with life-threatening Code GI Bleed accepted for transfer from outside hospital to ED, ETA (XX) minutes. Call back Dr. XXX at XXX-XXX-XXXX only if you have questions.”

The group page includes *First Line Responders: GI fellow on call, IR fellow on call, ED Radiology attending, ED Radiology fellow, CT technologist,* as well as additional staff anticipated to assist: MICU attending and Nurse Administrator.

1. **Newly Diagnosed Patients within the ED**

If a patient is newly diagnosed with life-threatening GI bleeding as defined above in the Brigham ED, the emergency medicine attending will ask the ED business specialist to contact the page operator to activate the Code GI Bleed Team Pager (Group 294) and provide the patient name, MRN, patient location, activating clinician and call-back #, “Patient with life-threatening Code GI Bleed in ED. Please call. Call back Dr. XXX at XXX-XXX-XXXX.”

If you have questions regarding this policy, please contact the ED Administrative Attending Physician.

**Approved by: Name**

**Vice Chair of Clinical Affairs**

**Department of Emergency Medicine**

**Name**

**Division Chief of Gastroenterology**

**Department of Medicine**

**Name**

**Division Chief of Interventional Radiology**

**Department of Radiology**

**Name**

**Medical ICU Director, Division of Pulmonary Medicine**

**Department of Medicine**

**Name**

**Division Chief of Emergency Radiology**

**Department of Radiology**

**Version date: 11/29/2022**
